# Supplementary material for: The independent contribution of miRNAs to the missing heritability in CYP3A4/5 functionality and the metabolism of atorvastatin
Source: PubMed Central journal article supplement (PMC4876377; doi:10.1038/srep26544), 2016-05-23
Supplement: srep26544-s1.pdf [file srep26544-s1.pdf]

## Supplementary Information

### The independent contribution of miRNAs to the missing heritability in CYP3A4/5 functionality and the metabolism of atorvastatin

Ju-E Liu<sup>1,2,#</sup>, Bin Ren<sup>1,#</sup>, Lan Tang<sup>3,#</sup>, Qian-Jie Tang<sup>2,4</sup>, Xiao-Ying Liu<sup>2</sup>, Xin Li<sup>2,5</sup>, Xue Bai<sup>2,6</sup>, Wan-Ping Zhong<sup>2,3</sup>, Jin-Xiu Meng<sup>2</sup>, Hao-Ming Lin<sup>7</sup>, Hong Wu<sup>7</sup>, Ji-Yan Chen<sup>2,8</sup>, Shi-Long Zhong<sup>2,8,\*</sup>

#Ju-E Liu, Bin Ren and Lan Tang contribute equally to this paper

1. Department of Pharmacy, The First Affiliated Hospital, Sun Yat-sen University, Guangzhou, Guangdong 510080, China
2. Medical Research Center, Guangdong General Hospital, Guangzhou, Guangdong 510080, China
3. Department of Pharmaceutics, School of Pharmaceutical Sciences, Southern Medical University, Guangzhou 510515, China.
4. Institute of Chinese medical science, Guangdong TCM key Laboratory for metabolism, Guangdong pharmaceutical university, Guangzhou 510006, China
5. Department of Pharmacology, School of Pharmaceutical Sciences, Guangzhou Medical University, Guangzhou 511436, China
6. School of pharmaceutical science, Sun Yat-Sen University, Guangzhou, Guangdong 510006, China
7. Department of Hepatobiliary Surgery, Sun Yat-Sen Memorial Hospital, Sun Yat-sen University, Guangzhou 510120, China
8. Guangdong Cardiovascular Institute, Guangdong Academy of Medical Sciences, Guangzhou, Guangdong 510080, China

#### \*Correspondence to

Shi-Long Zhong, Ph.D.

Professor of Medical Research Center, Guangdong General Hospital,  
Guangdong Cardiovascular Institute,  
Guangdong Academy of Medical Sciences.  
106 Zhongshan Road, Weilun Bldg.1112,  
Guangzhou 510080, P. R. China  
Tel: +8620-83827812 - 51157  
Email: [zhongsl@hotmail.com](mailto:zhongsl@hotmail.com)

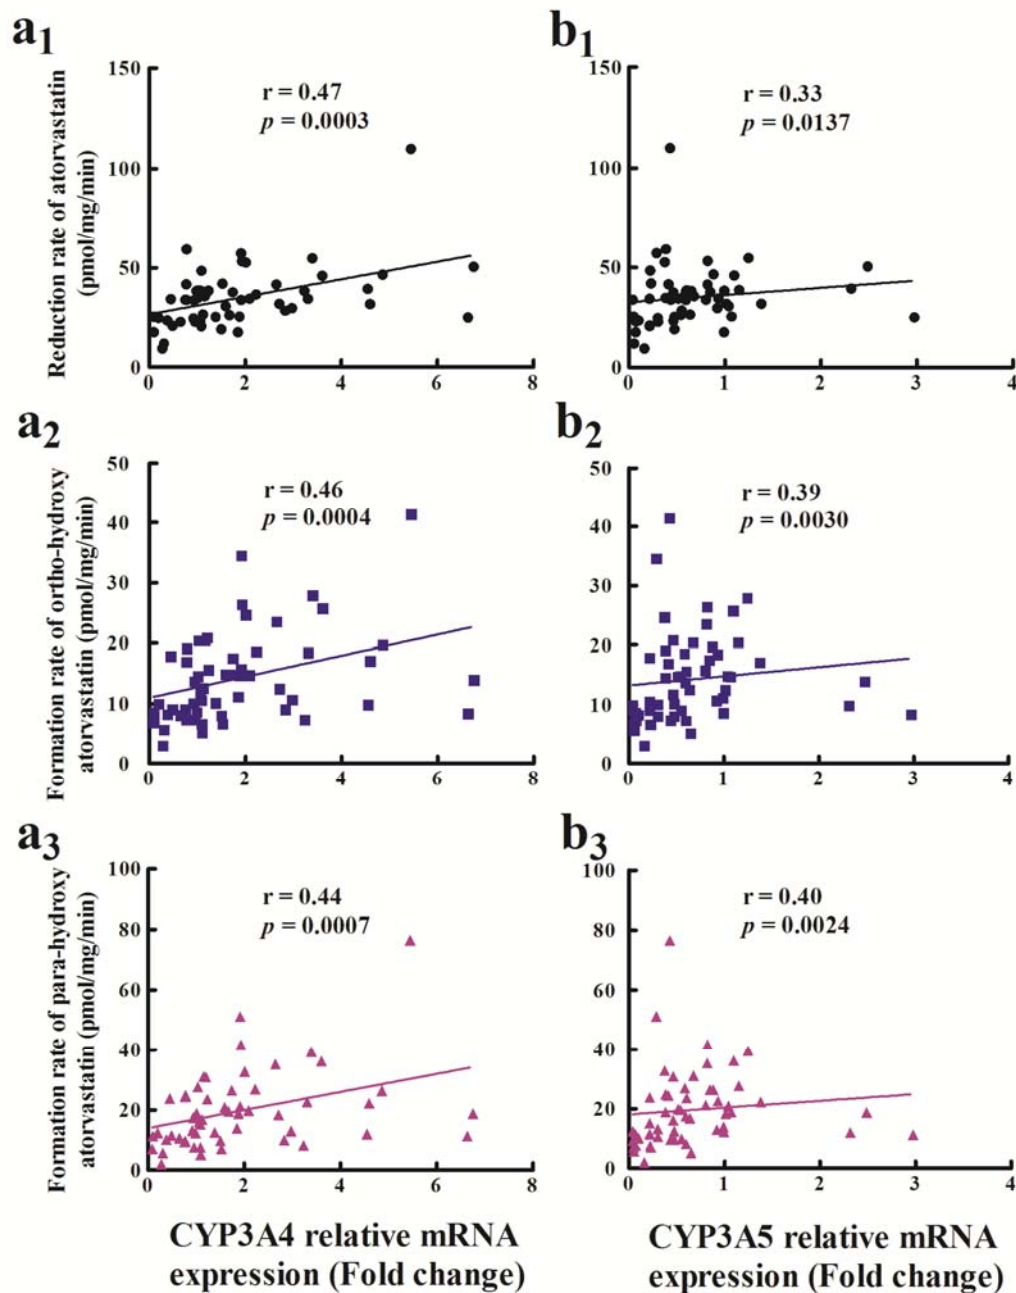

**Supplementary Figure S1. Correlation between CYP3A gene expression and the reduction rate of atorvastatin or the formation rate of two metabolites of atorvastatin.** The expression of CYP3A4 was significantly associated with reduction rate of atorvastatin (**a**<sub>1</sub>), formation rate of ortho-hydroxy atorvastatin (**a**<sub>2</sub>), formation rate of para-hydroxy atorvastatin (**a**<sub>3</sub>). Expression of CYP3A5 was associated with reduction of atorvastatin (**b**<sub>1</sub>), formation of ortho-hydroxy atorvastatin (**b**<sub>2</sub>), and formation of para-hydroxy atorvastatin (**b**<sub>3</sub>).

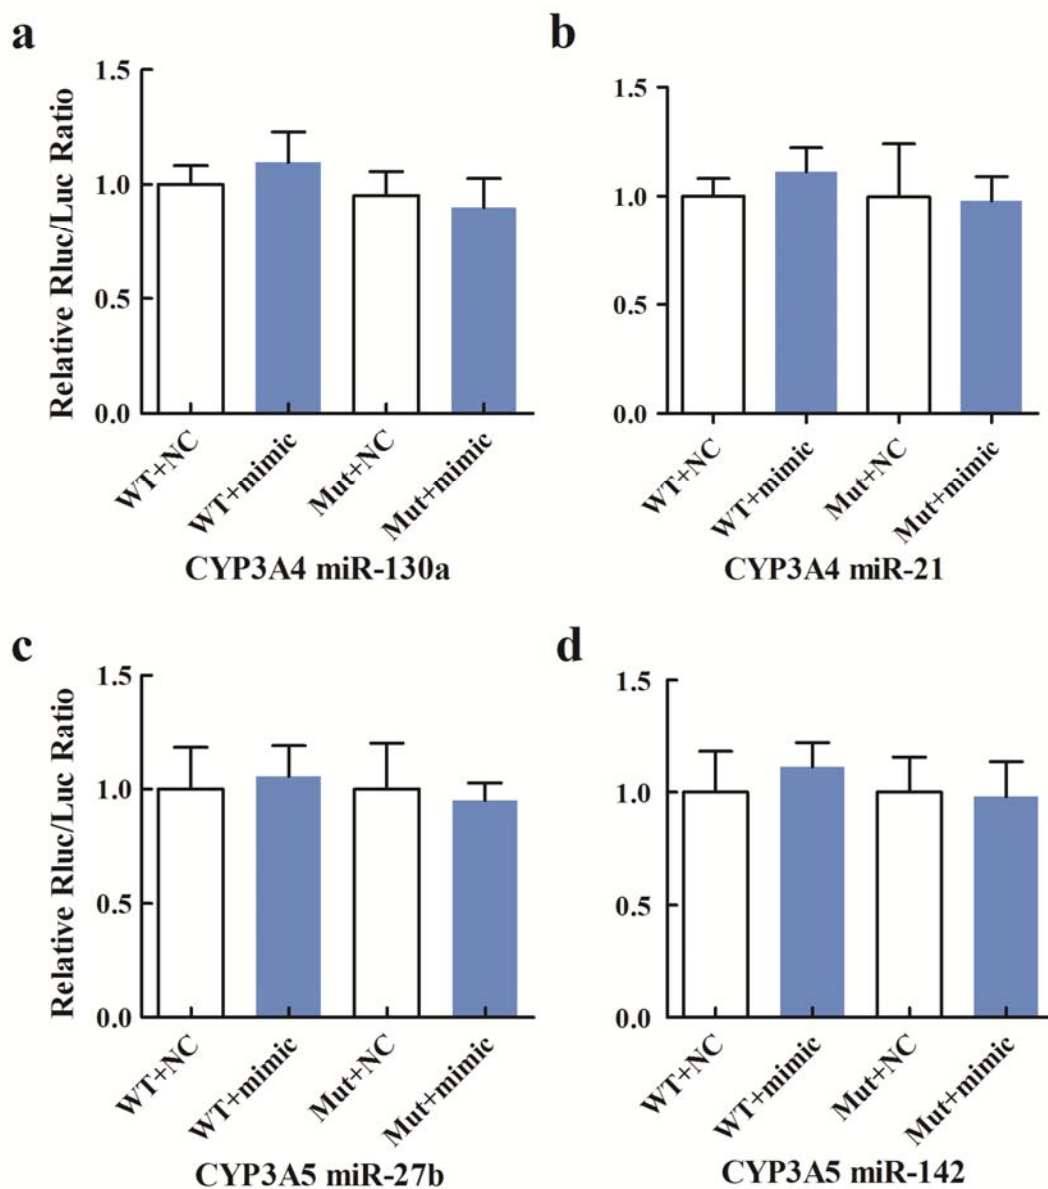

**Supplementary Figure S2.** Luciferase reporter assay to evaluate the direct inhibition of miR-130a, miR-21, miR-27b and miR-142 on CYP3A4 or CYP3A5 expression. (a) miR-130a did not target the predicted binding sites in the CYP3A4 3'-UTR. (b) miR-21 did not target the predicted binding sites in the CYP3A4 3'-UTR. (c) miR-27b did not target the predicted binding sites in the CYP3A5 3'-UTR. (d) miR-142 did not target the predicted binding sites in the CYP3A5 3'-UTR.

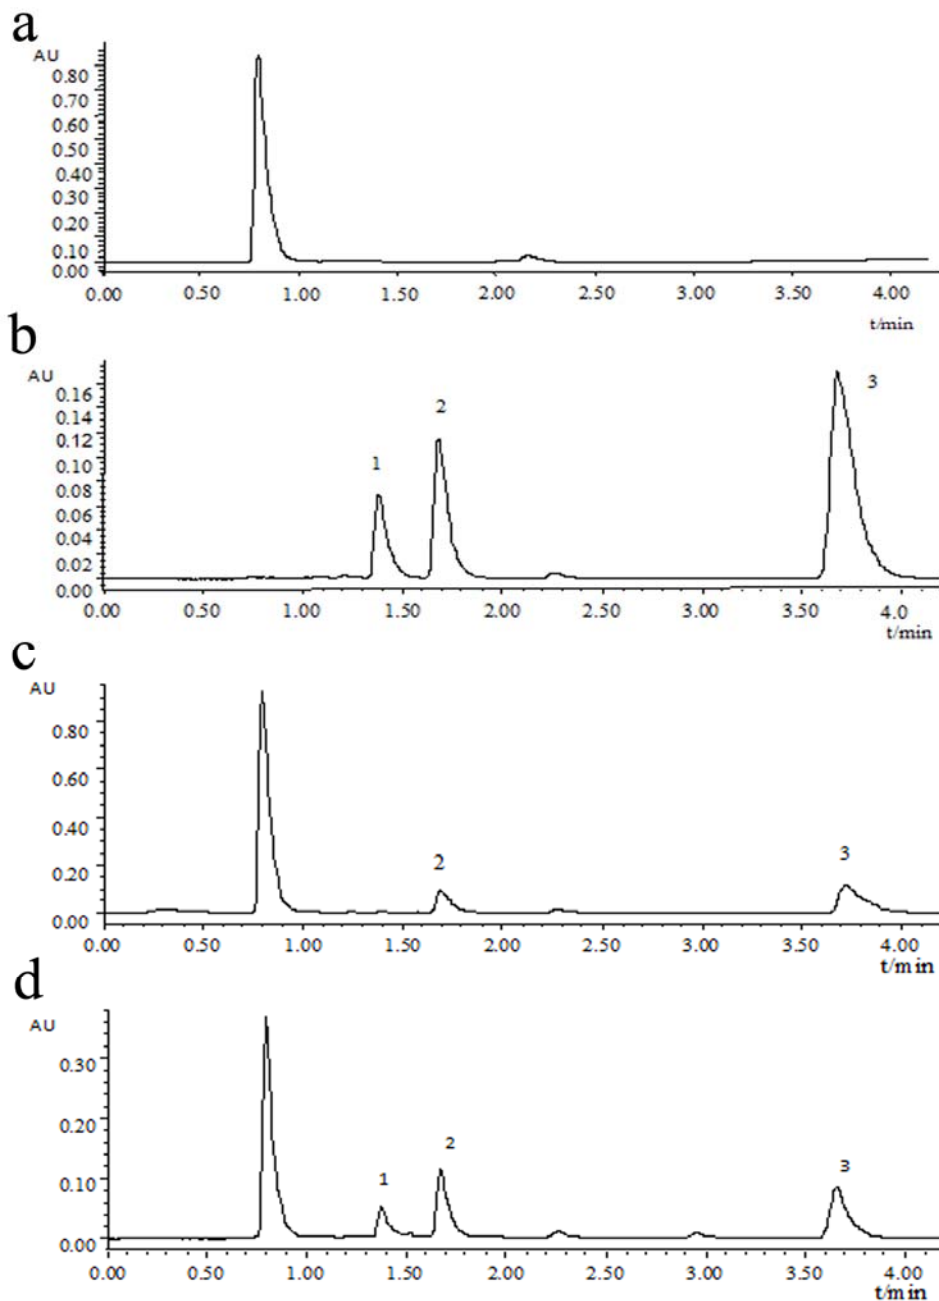

**Supplementary Figure S3. The chromatograms of testosterone and its metabolite.** (a) blank microsomal; (b) reference standards; (c) inactive microsomal incubation mixtures; (d) active microsomal incubation mixtures. 1, 2 and 3 represent  $6\beta$ -hydroxytestosterone, internal standard hydrocortisone and testosterone, respectively.

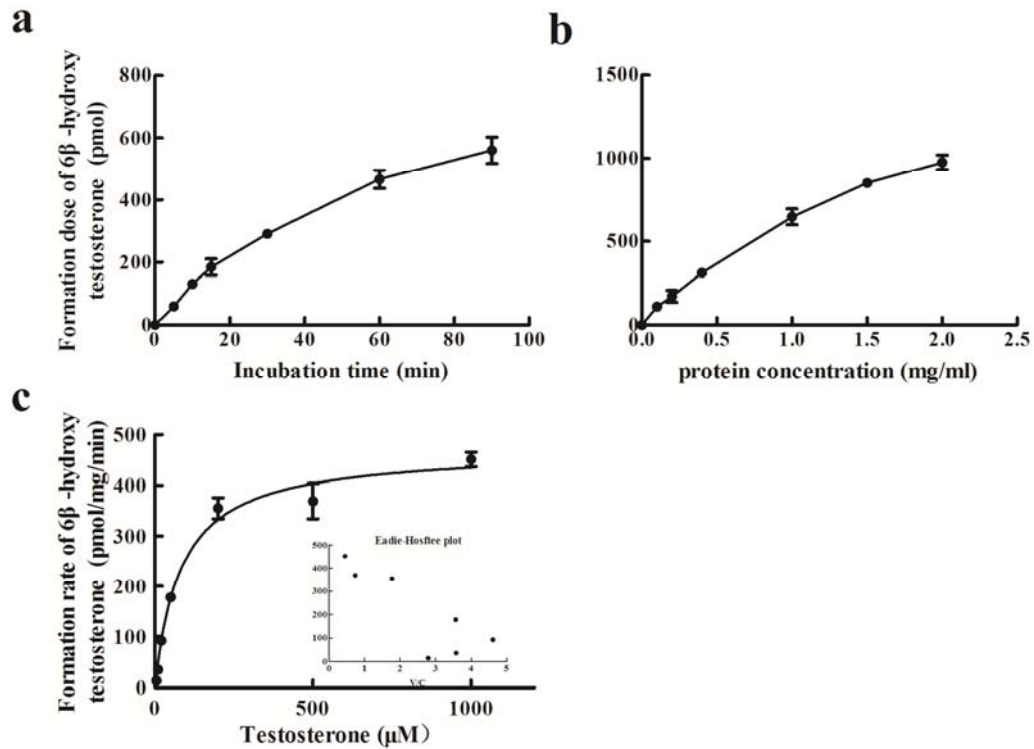

**Supplementary Figure S4. Effect of testosterone incubation time and microsomal protein concentration on the formation of 6β-OHT by human liver microsomes and enzyme kinetic parameters. (a) Time-dependent formation of 6β-OHT in human liver microsome. (b) Microsomal protein concentration-dependent formation of 6β-OHT. (c) Kinetic profiles of 6β-OHT activity in HLM with obtained  $K_m = 83.06 \pm 14.93 \mu\text{M}$ ,  $V_{\text{max}} = 470.7 \pm 22.0 \text{ pmol/mg/min}$ . Human liver microsomes from a pooled sample were incubated with testosterone ( $20 \mu\text{M}$ ) for different times (0-90 min with  $0.5 \text{ mg/ml}$  protein) or at different protein concentrations (0- $2.0 \text{ mg/ml}$  for 20 min). Data shown are the average mean  $\pm$  S.D. of three independent experiments.**

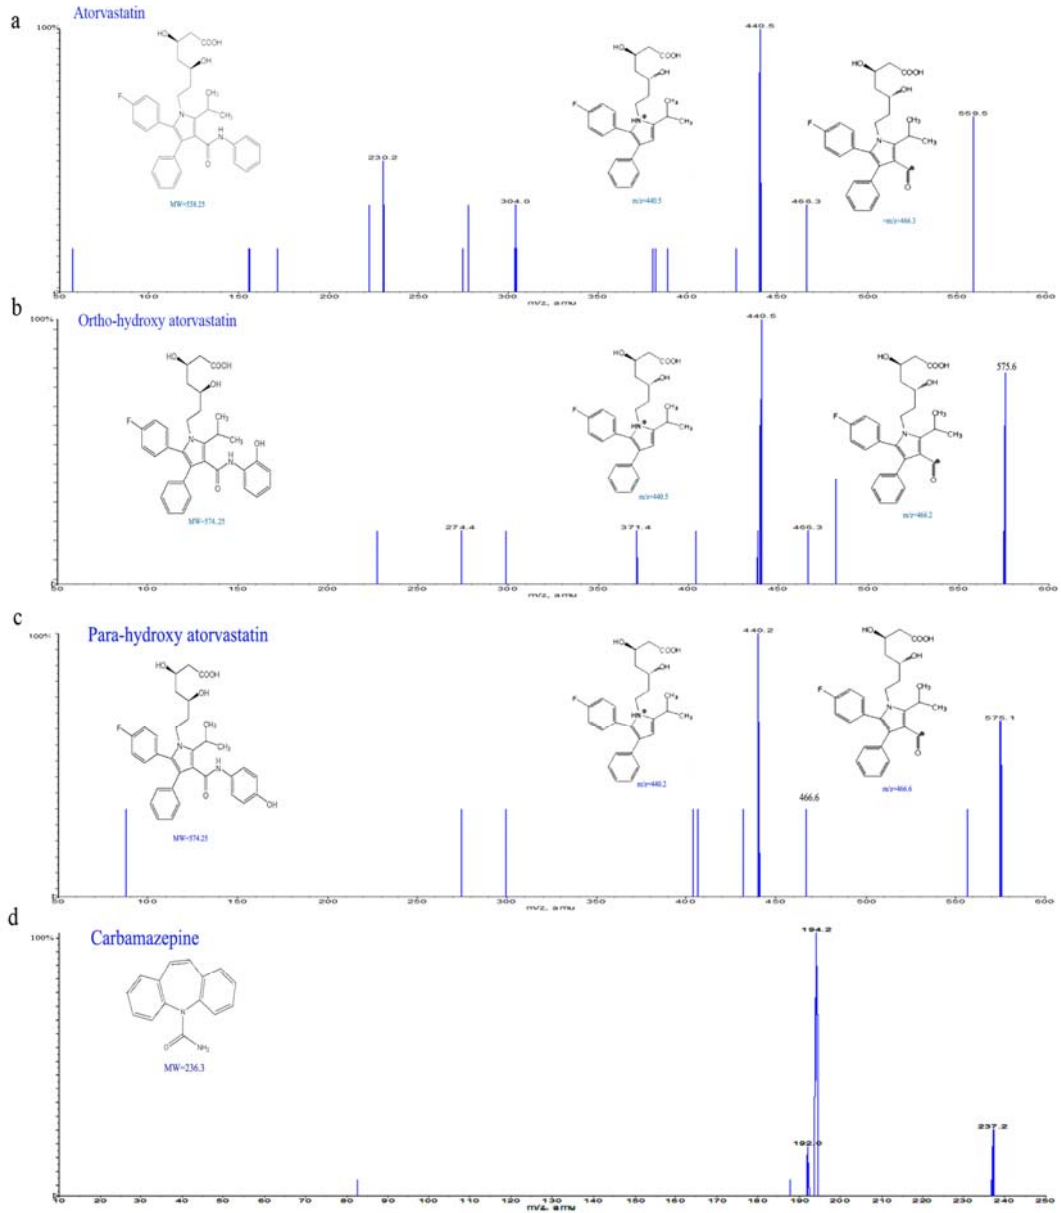

**Supplementary Figure S5. Product ion spectra of atorvastatin (A), ortho-hydroxy atorvastatin (B), para-hydroxy atorvastatin (C), and carbamazepine (D).**

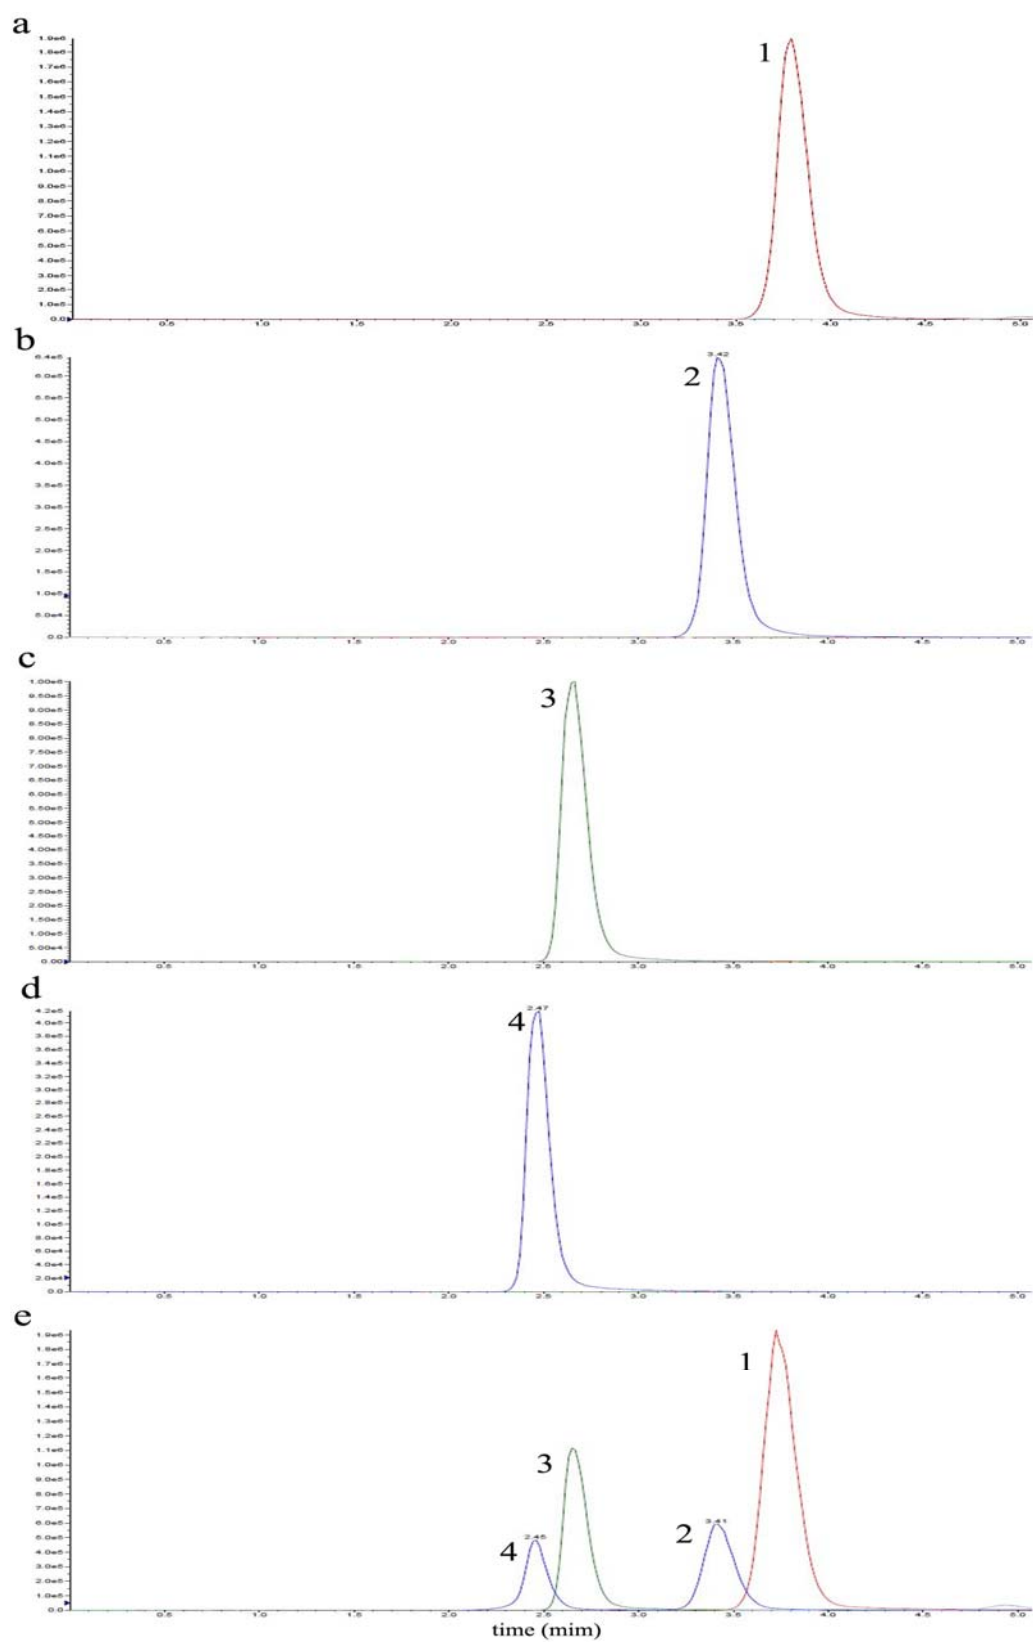

**Supplementary Figure S6. The chromatograms of atorvastatin and its metabolite.** (a) atorvastatin; (b) ortho-hydroxy atorvastatin; (c) para-hydroxy atorvastatin; (d) internal standards carbamazepine; (e) mixtures. 1, atorvastatin; 2, ortho-hydroxy atorvastatin; 3, internal standard; 4, para-hydroxy atorvastatin.

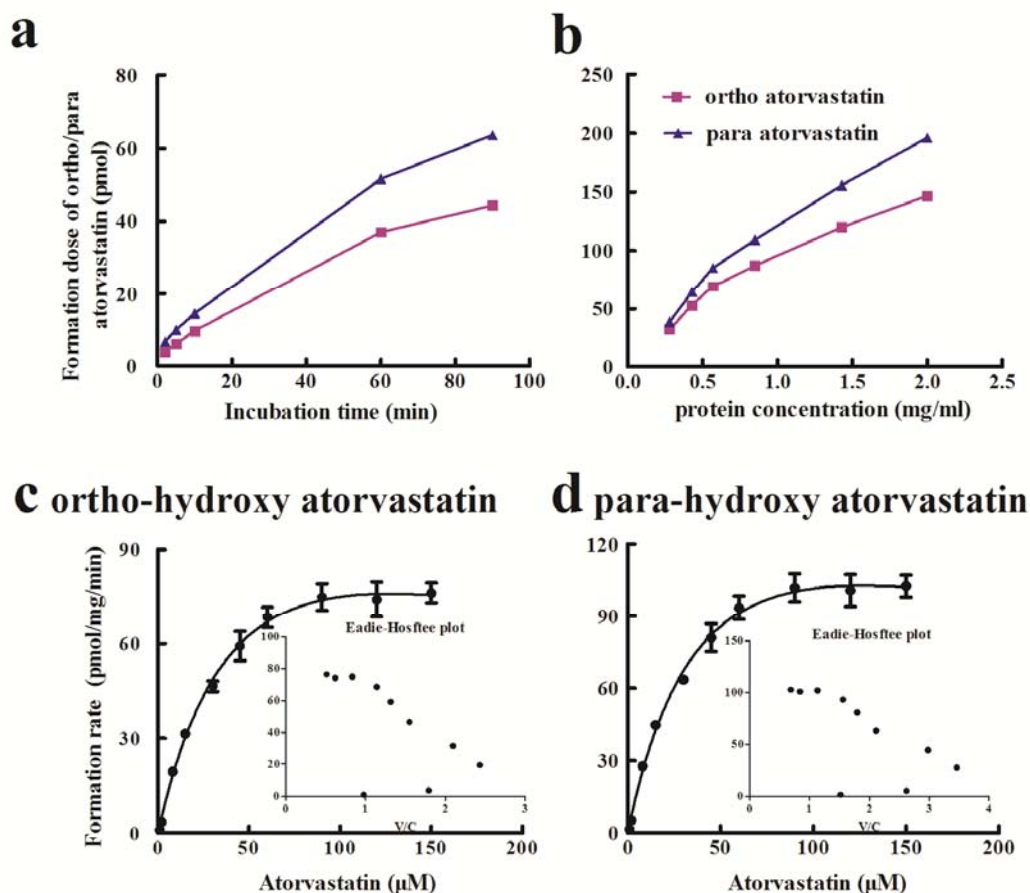

**Supplementary Figure S7. Enzyme kinetics and effect of atorvastatin incubation time and microsomal protein concentration on atorvastatin metabolism by human liver microsomes.** (a) Time-dependent formation of ortho- and para-hydroxy atorvastatin in human liver microsomes. (b) Microsomal protein concentration-dependent formation of ortho- and para-hydroxy atorvastatin. Enzyme kinetics of the formation rates of (c) ortho- and (d) para-hydroxy atorvastatin from atorvastatin in pooled human liver microsomes. Human liver microsomes from a pooled sample were incubated with testosterone (1-150  $\mu$ M) with 0.3 mg/ml protein for 60 min at 37  $^{\circ}$ C. Data shown are the average mean  $\pm$  S.D. of triplicate incubations.



| a               | Predicted consequential pairing of target region               | Position  |
|-----------------|----------------------------------------------------------------|-----------|
| hsa-miR-491     | 3' CAUCUCCUUAG-----AACGUAUUC 5'<br>**   *   **   *****   *   * | 93-124    |
| CYP3A4 MRE 491  | 5' GAAGATGGGCTTCATCCAATGGACTGCATAAA 3'                         |           |
| hsa-miR-27a     | 3' CGCCUUGAAU-CGGUGACACUU 5'<br> : *   *   **   *   *          | 593-614   |
| CYP3A4 MRE 27a  | 5' GTGAAAGTTAATCCACTGTGAC 3'                                   |           |
| hsa-miR-107     | 3' ACUAUCGGGAC---AUG-UUACGACGA 5'<br>*****   ***** *::   : **  | 863-886   |
| CYP3A4 MRE 107  | 5' ACTTGAACCTGGGAGCGGATGTTGAA 3'                               |           |
| hsa-miR-103     | 3' AGUAUCGGGAC---AUG-UUACGACGA 5'<br>*****   ***** *::   : **  | 858-886   |
| CYP3A4 MRE 103  | 5' ACTTGAACCTGGGAGCGGATGTTGAA 3'                               |           |
| hsa-miR-106a    | 3' CAUUCUUC--CGAAUGUAACGUC 5'<br>***   *   *   *   *   *   *   | 881-903   |
| CYP3A4 MRE 106a | 5' TGTGAAGTGAGCTGAGATTGCAC 3'                                  |           |
| hsa-miR-27b     | 3' CGUCUUGAAU-CGGUGACACUU 5'<br> :***   *   **   *   *         | 593-614   |
| CYP3A4 MRE 27b  | 5' GTGAAAGTTAATCCACTGTGAC 3'                                   |           |
| hsa-miR-21      | 3' AGUUGUAGUCAG-ACUAUUCGAU 5'<br>**:: :***  :***: :    :       | 869-894   |
| CYP3A4 MRE 21   | 5' GAGCGGATGTTGAAGTGAGCTG 3'                                   |           |
| hsa-miR-206     | 3' GGUGUGAAGGAAUGUAAGGU 5'<br> :    *   **   :    *            | 1073-1093 |
| CYP3A4 MRE 206  | 5' CTACAC-CT--CTTGCATTCCA 3'                                   |           |
| hsa-miR-130a    | 3' UAC-GGGAAAUUGUAACGUGAC 5'<br>** *:: :*****   *   :          | 134-150   |
| CYP3A4 MRE 130a | 5' GGGATTCT--GTACA-TGCATTG 3'                                  |           |
| hsa-miR-130a    | 3' UACGGGAAAUUGUAACGUGAC 5'<br>**  :***** *   *   *            | 887-905   |
| CYP3A4 MRE 130a | 5' GAGCT----GAGATGTCACCA 3'                                    |           |
| hsa-miR-130a    | 3' UACGGGAAAUUGUAACGUGAC 5'<br>***   *****   *   : *           | 1067-1091 |
| CYP3A4 MRE 130a | 5' TTTCCCTACACCTCTGTCATT 3'                                    |           |
| b               | Predicted consequential pairing of target region               | Position  |
| hsa-miR-491-3p  | 3' CAUCUCCUUAGAACGUAUUC 5'<br>*****:: :                        | 185-203   |
| CYP3A5 MRE 491  | 5' TTTGTGTTAATATTTGCATAAG 3'                                   |           |
| hsa-miR-27b     | 3' CGUCUUGAAUCGGUGACACUU 5'<br>*****   *   *   *               | 338-361   |
| CYP3A5 MRE 27b  | 5' CCACTAATACCACACTGTGGT 3'                                    |           |
| hsa-miR-27a     | 3' CGCCUUGAAUCGGUGACACUU 5'<br>*****   *   *   *               | 338-361   |
| CYP3A5 MRE 27a  | 5' CCACTAATACCACACTGTGGT 3'                                    |           |
| hsa-miR-142     | 3' UCAUCACGAAAGUAAAUAUC 5'<br>*****   *   *   *                | 414-420   |
| CYP3A5 MRE 142  | 5' GGCAAUUCUUCCACUUUAUU 3'                                     |           |
| hsa-miR-371     | 3' UUUCACGGCGGUA-GAAACUCA 5'<br>***** :    **   *   **         | 508-528   |
| CYP3A5 MRE 371  | 5' ACAAACCTGCCATAATTTTGATA 3'                                  |           |
| hsa-miR-126     | 3' GCGCAUGGUUUUCAUUAUUAUC 5'<br>*****   *   *   *              | 1065-1071 |
| CYP3A5 MRE 126  | 5' CCAUUUUUCUCUCAUUAUU 3'                                      |           |

**Supplementary Figure S8.** MiRNA recognition element within CYP3A4 or CYP3A5 3'-UTR predictive by TargetScan, FINDTAR3 and miRanda. (a) predictive binding sites of miRNAs within CYP3A4 3'-UTR. (b) predictive binding sites of miRNAs within CYP3A5 3'-UTR

**Supplementary Table 1.** Baseline clinical characteristics and CYP3A4/5 genotypes impact on gene expression, CYP3A activity and metabolism of atorvastatin

| Factors                    | Aatorvastatin |       | Ortho-hydroxy atorvastatin |       | Para-hydroxy atorvastatin |       | CYP3A4 mRNA  |       | CYP3A5 mRNA  |       | CYP3A activity |       |
|----------------------------|---------------|-------|----------------------------|-------|---------------------------|-------|--------------|-------|--------------|-------|----------------|-------|
|                            | B or Mean±SD  | P     | B or Mean±SD               | P     | B or Mean±SD              | P     | B or Mean±SD | P     | B or Mean±SD | P     | B or Mean±SD   | P     |
| Sex(Male)                  | -10.49        | 0.017 | -2.95                      | 0.183 | -5.45                     | 0.149 | -0.281       | 0.544 | 0.042        | 0.810 | -86.73         | 0.137 |
| Age (year)                 | -0.13         | 0.437 | -0.06                      | 0.438 | -0.14                     | 0.290 | -0.028       | 0.085 | -0.007       | 0.292 | -2.05          | 0.335 |
| Concomitant enzyme inducer | 7.82          | 0.184 | 1.98                       | 0.501 | 3.77                      | 0.465 | 0.002        | 0.998 | -0.283       | 0.208 | 29.75          | 0.703 |
| Liver cancer               | -3.38         | 0.416 | -0.74                      | 0.722 | -1.76                     | 0.619 | -0.775       | 0.066 | -0.285       | 0.070 | -37.45         | 0.492 |
| Hepatitis B                | -2.69         | 0.600 | -0.51                      | 0.841 | -1.26                     | 0.773 | -0.402       | 0.454 | -0.038       | 0.853 | -69.51         | 0.313 |
| CYP3A5                     |               |       |                            |       |                           |       |              |       |              |       |                |       |
| *1/*1 or *1/*3             | 38.41±9.55    | 0.012 | 16.19±6.77                 | 0.038 | 22.87±10.44               | 0.022 | 2.412±1.849  | 0.044 | 0.980±0.719  | 0.001 | 285.9±124.9    | 0.029 |
| *3/*3                      | 32.52±17.78   |       | 12.94±7.86                 |       | 17.49±14.04               |       | 1.536±1.573  |       | 0.456±0.351  |       | 243.6±236.6    |       |
| CYP3A4                     |               |       |                            |       |                           |       |              |       |              |       |                |       |
| *1/*1                      | 34.19±19.43   | 0.500 | 13.81±8.76                 | 0.194 | 18.86±15.45               | 0.234 | 1.530±1.217  | 0.222 | 0.484±0.353  | 0.033 | 266.2±249.6    | 0.654 |
| *1/*1G                     | 36.00±9.85    |       | 15.37±6.17                 |       | 21.35±9.81                |       | 2.118±1.700  |       | 0.764±0.619  |       | 258.5±130.4    |       |
| *1G/*1G                    | 33.14±6.17    |       | 10.82±5.32                 |       | 15.34±9.19                |       | 3.046±2.484  |       | 1.372±1.079  |       | 231.8±165.9    |       |

**Supplementary Table 2.** Impact of miRNAs on CYP3A gene expression and activity, and atorvastatin metabolism.

| microRNA | CYP3A4 mRNA |       |       | CYP3A5 mRNA |       |       | CYP3A activity |       |       | Aatorvastatin |       |       | Ortho-hydroxy atorvastatin |       |       | Para-hydroxy atorvastatin |       |       |
|----------|-------------|-------|-------|-------------|-------|-------|----------------|-------|-------|---------------|-------|-------|----------------------------|-------|-------|---------------------------|-------|-------|
|          | r           | P     | FDR   | r           | P     | FDR   | r              | P     | FDR   | r             | P     | FDR   | r                          | P     | FDR   | r                         | P     | FDR   |
| miR-27b  | -0.37       | 0.006 | 0.020 | -0.25       | 0.068 | 0.221 | -0.50          | 0.000 | 0.007 | -0.38         | 0.004 | 0.022 | -0.43                      | 0.001 | 0.013 | -0.46                     | 0.001 | 0.013 |
| miR-206  | -0.28       | 0.040 | 0.104 | -0.21       | 0.129 | 0.335 | -0.38          | 0.005 | 0.016 | -0.42         | 0.001 | 0.013 | -0.36                      | 0.007 | 0.030 | -0.39                     | 0.003 | 0.013 |
| miR-103  | -0.02       | 0.908 | 0.910 | 0.04        | 0.791 | 0.861 | 0.00           | 0.990 | 0.990 | -0.11         | 0.431 | 0.560 | 0.02                       | 0.870 | 0.943 | 0.02                      | 0.893 | 0.910 |
| miR-107  | -0.02       | 0.910 | 0.910 | 0.03        | 0.839 | 0.861 | -0.01          | 0.951 | 0.990 | -0.06         | 0.655 | 0.710 | -0.01                      | 0.949 | 0.949 | -0.02                     | 0.910 | 0.910 |
| miR-371  | -0.13       | 0.362 | 0.471 | -0.06       | 0.664 | 0.861 | -0.09          | 0.535 | 0.696 | -0.07         | 0.624 | 0.710 | -0.05                      | 0.697 | 0.824 | -0.09                     | 0.515 | 0.670 |
| miR-491  | -0.11       | 0.417 | 0.493 | -0.04       | 0.800 | 0.861 | 0.04           | 0.778 | 0.920 | -0.03         | 0.819 | 0.819 | 0.07                       | 0.604 | 0.785 | 0.03                      | 0.813 | 0.910 |
| miR-1260 | -0.24       | 0.082 | 0.152 | -0.14       | 0.297 | 0.499 | -0.23          | 0.087 | 0.126 | -0.13         | 0.362 | 0.523 | -0.16                      | 0.259 | 0.374 | -0.19                     | 0.170 | 0.246 |
| miR-21   | -0.46       | 0.000 | 0.003 | -0.31       | 0.022 | 0.095 | -0.35          | 0.009 | 0.023 | -0.37         | 0.005 | 0.022 | -0.32                      | 0.018 | 0.059 | -0.35                     | 0.010 | 0.033 |
| miR-27a  | -0.27       | 0.049 | 0.106 | -0.18       | 0.180 | 0.390 | -0.38          | 0.005 | 0.016 | -0.27         | 0.045 | 0.117 | -0.31                      | 0.024 | 0.062 | -0.33                     | 0.014 | 0.036 |
| miR-106  | -0.16       | 0.253 | 0.365 | -0.02       | 0.861 | 0.861 | -0.28          | 0.040 | 0.074 | -0.23         | 0.094 | 0.204 | -0.27                      | 0.050 | 0.108 | -0.28                     | 0.040 | 0.087 |
| miR-126  | -0.22       | 0.114 | 0.185 | -0.14       | 0.307 | 0.499 | -0.24          | 0.073 | 0.119 | -0.15         | 0.285 | 0.463 | -0.20                      | 0.149 | 0.242 | -0.24                     | 0.078 | 0.127 |
| miR-130a | -0.45       | 0.001 | 0.004 | -0.32       | 0.016 | 0.095 | -0.40          | 0.002 | 0.013 | -0.31         | 0.020 | 0.065 | -0.36                      | 0.007 | 0.030 | -0.39                     | 0.003 | 0.013 |
| miR-142  | -0.49       | 0.000 | 0.003 | -0.32       | 0.005 | 0.065 | -0.31          | 0.020 | 0.043 | -0.22         | 0.116 | 0.215 | -0.24                      | 0.085 | 0.158 | -0.25                     | 0.066 | 0.123 |

**Supplementary Table 3.** Multiple regression analysis with forward selection for modeling metabolism of atorvastatin.

| Dependent variable         | Parameter      | Estimate   | Partial R <sup>2</sup> | Model R <sup>2</sup> | P value |
|----------------------------|----------------|------------|------------------------|----------------------|---------|
| CYP3A4 mRNA                |                |            |                        |                      |         |
|                            | Intercept      | 2.459      |                        |                      |         |
|                            | miRNA142       | -231.952   | 0.122                  | 0.122                | 0.002   |
|                            | liver cancer   | -0.999     | 0.102                  | 0.224                | 0.010   |
|                            | CYP3A4*1G      | 0.649      | 0.069                  | 0.293                | 0.032   |
| CYP3A5 mRNA                |                |            |                        |                      |         |
|                            | Intercept      | 1.245      |                        |                      |         |
|                            | CYP3A5*3       | -0.474     | 0.189                  | 0.189                | 0.001   |
|                            | miRNA142       | -75.145    | 0.094                  | 0.282                | 0.005   |
|                            | liver cancer   | -0.304     | 0.067                  | 0.349                | 0.028   |
| CYP3A activity             |                |            |                        |                      |         |
|                            | Intercept      | 5.401      |                        |                      |         |
|                            | miR-27b        | -29.334    | 0.200                  | 0.200                | 0.002   |
|                            | CYP3A4 mRNA    | 0.158      | 0.095                  | 0.295                | 0.009   |
|                            | miR-206        | 131325.000 | 0.058                  | 0.353                | 0.037   |
| Atorvastatin               |                |            |                        |                      |         |
|                            | Intercept      | 19.621     |                        |                      |         |
|                            | CYP3A activity | 0.059      | 0.600                  | 0.600                | <.0001  |
| Ortho-hydroxy atorvastatin |                |            |                        |                      |         |
|                            | Intercept      | 5.538      |                        |                      |         |
|                            | CYP4A activity | 0.034      | 0.788                  | 0.788                | <.0001  |
| Para-hydroxy atorvastatin  |                |            |                        |                      |         |
|                            | Intercept      | 4.288      |                        |                      |         |
|                            | CYP5A activity | 0.059      | 0.839                  | 0.839                | <.0001  |
